# Supplementary material for: The effect of variant interference on de novo assembly for viral deep sequencing
Source: BMC Genomics. 2020 Jun 22;21:421. doi: 10.1186/s12864-020-06801-w (PMC7306937; doi:10.1186/s12864-020-06801-w)
Supplement: Supplementary file 2 — Additional file 2. Number of contigs generated by SPades using the simulated data of two variants differed from 75% PID to 99.6% PID, across 20%-80% GC content. [file 12864_2020_6801_MOESM2_ESM.xlsx]

## Sheet: 2K
Simulation Setting: 50X coverage of reads. Single end read; read length 250. Two sequences differ for X %ID as below																	Pearson's r	p-value
		Result / Number of Contigs															0.6246-0.7596	<0.0001
		2K															Spearman ρ	p-value
Mutation		GC20%	GC25%	GC30%	GC35%	GC40%	GC45%	GC50%	GC55%	GC60%	GC65%	GC70%	GC75%	GC80%	AVERAGE		0.8455-0.9213	<0.0001
1 change in	%ID	#	#	#	#	#	#	#	#	#	#	#	#	#	# of contigs
4	75	2	2	2	2	2	2	2	2	2	2	2	2	2	2
5	80	2	2	2	2	2	2	2	2	2	2	2	2	2	2
6	83.3333	2	2	2	2	2	2	2	2	2	2	2	2	2	2
7	85.7143	2	2	2	2	2	2	2	2	2	2	2	2	2	2
8	87.5	2	2	2	2	2	2	2	2	2	2	2	2	2	2
9	88.8889	2	2	2	2	2	2	2	2	2	2	2	2	2	2
10	90	2	2	2	2	2	2	2	2	2	2	2	2	2	2
11	90.9091	2	2	2	2	2	2	2	2	2	2	2	2	2	2
12	91.6667	2	2	2	2	2	2	2	2	2	2	2	2	2	2
13	92.3077	2	2	2	2	2	2	2	2	2	2	2	2	2	2
14	92.8571	2	2	2	2	2	2	2	2	2	2	2	2	2	2
15	93.3333	2	2	2	2	2	2	2	2	2	2	2	2	2	2
16	93.75	2	2	2	2	2	2	2	2	2	2	2	2	2	2
17	94.1176	2	2	2	2	2	2	2	2	2	2	2	2	2	2
18	94.4444	2	2	2	2	2	2	2	2	2	2	2	2	2	2
19	94.7368	2	2	2	2	2	2	2	2	2	2	2	2	2	2
20	95	2	2	2	2	2	2	2	2	2	2	2	2	2	2
21	95.2381	2	2	2	2	2	2	2	2	2	2	2	2	2	2
22	95.4545	2	2	3	2	2	2	2	2	2	2	2	3	2	2.15385
23	95.6522	2	2	2	2	2	3	2	2	3	2	2	2	3	2.23077
24	95.8333	2	2	2	2	2	2	2	3	3	2	2	2	2	2.15385
25	96	2	2	2	2	2	3	2	2	2	3	2	2	2	2.15385
26	96.1538	2	2	3	3	2	2	2	2	2	2	3	2	3	2.30769
27	96.2963	2	3	2	3	2	2	2	2	2	2	2	3	4	2.38462
28	96.4286	2	2	2	2	2	3	2	2	2	3	2	2	3	2.23077
29	96.5517	2	2	2	2	2	2	2	2	2	2	2	2	2	2
30	96.6667	2	2	3	2	3	2	2	2	3	2	3	2	3	2.38462
31	96.7742	2	2	2	2	2	2	3	2	2	2	2	2	2	2.07692
32	96.875	2	2	2	3	3	2	2	2	2	3	2	2	2	2.23077
33	96.9697	2	2	2	2	3	3	2	3	2	2	3	2	2	2.30769
34	97.0588	2	3	2	3	3	2	2	2	2	2	2	2	2	2.23077
35	97.1429	2	2	2	2	2	2	2	2	2	3	2	3	2	2.15385
36	97.2222	2	2	2	3	3	2	2	2	2	3	3	2	3	2.38462
37	97.2973	2	3	2	3	3	2	3	2	2	2	2	2	3	2.38462
38	97.3684	2	2	2	2	2	2	3	3	2	2	2	2	3	2.23077
39	97.4359	3	2	2	2	2	2	2	2	3	3	2	3	2	2.30769
40	97.5	3	2	2	3	2	2	2	2	2	2	3	2	2	2.23077
41	97.561	2	3	2	2	3	2	2	2	2	2	3	2	2	2.23077
42	97.619	2	2	2	2	2	2	2	2	2	2	2	3	3	2.15385
43	97.6744	2	2	2	2	2	3	2	2	3	3	2	3	2	2.30769
44	97.7273	2	3	3	2	2	2	2	3	2	2	3	2	2	2.30769
45	97.7778	2	3	2	3	3	3	2	3	2	2	2	3	4	2.61538
46	97.8261	2	3	2	2	2	3	2	2	3	2	2	2	2	2.23077
47	97.8723	2	2	2	2	2	2	2	3	4	3	3	4	2	2.53846
48	97.9167	2	3	2	2	2	2	2	2	3	2	2	3	2	2.23077
49	97.9592	2	2	3	3	3	3	3	3	2	2	3	3	2	2.61538
50	98	2	3	2	2	3	2	2	2	2	3	3	2	3	2.38462
51	98.0392	3	3	4	2	3	2	2	3	2	2	2	3	2	2.53846
52	98.0769	2	3	2	2	2	2	2	3	3	2	2	3	3	2.38462
53	98.1132	2	3	2	2	3	3	2	3	4	3	3	2	3	2.69231
54	98.1481	2	2	2	3	3	2	2	3	2	2	3	3	2	2.38462
55	98.1818	3	3	3	3	2	2	2	2	2	3	4	3	3	2.69231
56	98.2143	2	3	2	3	2	3	3	2	2	2	3	4	4	2.69231
57	98.2456	2	3	2	2	3	2	3	3	2	2	2	3	2	2.38462
58	98.2759	3	4	3	2	2	2	2	2	2	2	2	3	2	2.38462
59	98.3051	2	2	2	2	2	3	2	2	2	2	2	2	3	2.15385
60	98.3333	3	3	3	2	2	2	2	3	3	4	3	2	2	2.61538
61	98.3607	2	2	3	2	2	3	2	4	3	3	3	2	3	2.61538
62	98.3871	2	2	2	3	2	3	2	2	3	2	2	2	3	2.30769
63	98.4127	2	2	2	2	2	3	2	2	3	2	3	3	3	2.38462
64	98.4375	3	2	2	2	2	3	2	3	3	2	4	2	3	2.53846
65	98.4615	2	3	3	2	2	3	2	2	3	2	2	2	3	2.38462
66	98.4848	2	2	2	2	2	3	2	2	2	2	2	2	3	2.15385
67	98.5075	2	4	2	2	3	2	2	2	2	2	2	4	2	2.38462
68	98.5294	3	2	2	3	2	2	2	2	2	2	2	3	2	2.23077
69	98.5507	2	3	2	2	3	3	3	3	2	2	2	2	2	2.38462
70	98.5714	2	2	2	3	2	3	2	2	2	2	3	2	3	2.30769
71	98.5915	2	2	3	3	2	2	2	4	2	3	3	3	2	2.53846
72	98.6111	2	2	2	2	2	2	2	2	3	2	2	2	2	2.07692
73	98.6301	2	2	2	2	2	3	2	2	3	4	2	3	3	2.46154
74	98.6486	4	2	2	2	2	2	4	3	2	2	3	3	2	2.53846
75	98.6667	2	2	4	2	3	4	2	3	2	2	3	2	4	2.69231
76	98.6842	2	2	3	2	3	3	2	2	2	2	2	2	2	2.23077
77	98.7013	2	2	3	2	2	2	2	3	4	2	2	2	2	2.30769
78	98.7179	2	3	3	2	2	3	2	2	3	2	2	2	3	2.38462
79	98.7342	2	2	2	2	3	3	3	3	2	2	3	2	3	2.46154
80	98.75	2	3	2	2	2	2	2	2	2	2	2	2	3	2.15385
81	98.7654	3	4	2	3	3	2	2	3	2	2	3	2	2	2.53846
82	98.7805	3	3	2	2	3	2	3	3	3	2	2	2	2	2.46154
83	98.7952	3	2	2	3	2	2	3	3	3	2	2	4	2	2.53846
84	98.8095	2	2	2	3	2	3	2	2	3	2	2	2	2	2.23077
85	98.8235	2	2	3	2	3	2	3	4	3	2	2	3	2	2.53846
86	98.8372	2	2	2	4	2	2	2	2	2	2	2	3	3	2.30769
87	98.8506	4	2	2	3	2	3	3	2	2	3	2	2	3	2.53846
88	98.8636	3	2	2	2	2	3	2	3	2	2	2	2	2	2.23077
89	98.8764	2	3	3	2	2	2	2	2	3	2	2	2	4	2.38462
90	98.8889	2	2	2	3	4	2	2	2	2	2	3	3	3	2.46154
91	98.9011	3	4	2	2	2	2	2	4	2	3	3	2	2	2.53846
92	98.913	2	2	2	2	2	2	3	2	2	2	2	2	2	2.07692
93	98.9247	2	2	2	3	3	2	2	2	3	2	2	4	2	2.38462
94	98.9362	2	2	4	2	2	2	4	2	2	2	2	3	2	2.38462
95	98.9474	2	3	2	3	2	2	3	2	2	3	2	2	2	2.30769
96	98.9583	2	2	2	2	3	2	4	3	3	3	2	3	2	2.53846
97	98.9691	2	2	2	3	3	2	3	3	3	2	2	3	2	2.46154
98	98.9796	2	3	4	2	2	4	2	2	2	2	3	2	3	2.53846
99	98.9899	2	3	2	2	2	2	3	2	2	3	2	2	2	2.23077
100	99	2	2	3	3	2	2	2	3	3	2	2	2	2	2.30769
101	99.0099	3	3	4	3	3	2	2	3	2	2	3	2	2	2.61538
102	99.0196	2	2	2	2	2	2	3	2	2	2	2	2	2	2.07692
103	99.0291	2	2	5	3	2	4	5	3	2	2	4	3	2	3
104	99.0385	2	2	3	3	2	2	2	2	2	2	2	3	2	2.23077
105	99.0476	2	3	2	2	3	3	2	3	2	3	2	4	1	2.46154
106	99.0566	3	2	3	2	2	2	3	3	2	3	3	4	3	2.69231
107	99.0654	2	3	3	2	2	2	3	4	4	2	2	2	1	2.46154
108	99.0741	2	2	1	4	3	3	4	2	2	2	2	2	2	2.38462
109	99.0826	5	3	2	2	5	4	3	2	2	3	2	2	3	2.92308
110	99.0909	3	3	2	2	6	4	3	2	2	4	2	2	1	2.76923
111	99.0991	2	2	2	2	2	2	1	2	3	4	2	2	2	2.15385
112	99.1071	3	5	2	2	3	3	2	4	3	4	2	3	2	2.92308
113	99.115	2	4	2	3	3	2	2	2	2	2	2	5	1	2.46154
114	99.1228	2	2	2	3	2	3	2	2	3	2	2	3	3	2.38462
115	99.1304	2	3	4	3	2	2	3	2	2	2	4	3	4	2.76923
116	99.1379	2	2	2	2	2	3	3	3	3	3	2	3	2	2.46154
117	99.1453	2	2	2	2	3	2	2	2	1	2	2	2	2	2
118	99.1525	1	2	3	3	2	2	3	2	2	3	3	2	2	2.30769
119	99.1597	3	3	2	2	1	1	2	1	2	2	2	2	3	2
120	99.1667	3	2	2	2	3	2	2	2	2	3	2	2	2	2.23077
121	99.1736	2	2	3	2	1	3	3	3	3	2	2	2	2	2.30769
122	99.1803	3	4	4	3	3	3	2	3	2	2	1	2	3	2.69231
123	99.187	3	3	2	3	3	2	2	2	3	2	2	3	3	2.53846
124	99.1935	3	2	2	1	3	2	3	2	2	3	2	2	3	2.30769
125	99.2	3	1	4	2	2	3	2	2	2	3	2	2	2	2.30769
126	99.2063	1	2	4	2	2	3	4	2	2	2	2	2	2	2.30769
127	99.2126	2	2	2	2	6	2	2	3	2	3	2	3	2	2.53846
128	99.2188	1	1	1	1	1	1	1	1	1	1	1	1	1	1
129	99.2248	1	1	1	1	1	1	1	1	1	1	1	1	1	1
130	99.2308	1	1	1	1	1	1	1	1	1	1	1	1	1	1
131	99.2366	1	1	1	1	1	1	1	1	1	1	1	1	1	1
132	99.2424	1	1	1	1	1	1	1	1	1	1	1	1	1	1
133	99.2481	1	1	1	1	1	1	1	1	1	1	1	1	1	1
134	99.2537	1	1	1	1	1	1	1	1	1	1	1	1	1	1
135	99.2593	1	1	1	1	1	1	1	1	1	1	1	1	1	1
136	99.2647	1	1	1	1	1	1	1	1	1	1	1	1	1	1
137	99.2701	1	1	1	1	1	1	1	1	1	1	1	1	1	1
138	99.2754	1	1	1	1	1	1	1	1	1	1	1	1	1	1
139	99.2806	1	1	1	1	1	1	1	1	1	1	1	1	1	1
140	99.2857	1	1	1	1	1	1	1	1	1	1	1	1	1	1
141	99.2908	1	1	1	1	1	1	1	1	1	1	1	1	1	1
142	99.2958	1	1	1	1	1	1	1	1	1	1	1	1	1	1
143	99.3007	1	1	1	1	1	1	1	1	1	1	1	1	1	1
144	99.3056	1	1	1	1	1	1	1	1	1	1	1	1	1	1
145	99.3103	1	1	1	1	1	1	1	1	1	1	1	1	1	1
146	99.3151	1	1	1	1	1	1	1	1	1	1	1	1	1	1
147	99.3197	1	1	1	1	1	1	1	1	1	1	1	1	1	1
148	99.3243	1	1	1	1	1	1	1	1	1	1	1	1	1	1
149	99.3289	1	1	1	1	1	1	1	1	1	1	1	1	1	1
150	99.3333	1	1	1	1	1	1	1	1	1	1	1	1	1	1
151	99.3377	1	1	1	1	1	1	1	1	1	1	1	1	1	1
152	99.3421	1	1	1	1	1	1	1	1	1	1	1	1	1	1
153	99.3464	1	1	1	1	1	1	1	1	1	1	1	1	1	1
154	99.3506	1	1	1	1	1	1	1	1	1	1	1	1	1	1
155	99.3548	1	1	1	1	1	1	1	1	1	1	1	1	1	1
156	99.359	1	1	1	1	1	1	1	1	1	1	1	1	1	1
157	99.3631	1	1	1	1	1	1	1	1	1	1	1	1	1	1
158	99.3671	1	1	1	1	1	1	1	1	1	1	1	1	1	1
159	99.3711	1	1	1	1	1	1	1	1	1	1	1	1	1	1
160	99.375	1	1	1	1	1	1	1	1	1	1	1	1	1	1
161	99.3789	1	1	1	1	1	1	1	1	1	1	1	1	1	1
162	99.3827	1	1	1	1	1	1	1	1	1	1	1	1	1	1
163	99.3865	1	1	1	1	1	1	1	1	1	1	1	1	1	1
164	99.3902	1	1	1	1	1	1	1	1	1	1	1	1	1	1
165	99.3939	1	1	1	1	1	1	1	1	1	1	1	1	1	1
166	99.3976	1	1	1	1	1	1	1	1	1	1	1	1	1	1
167	99.4012	1	1	1	1	1	1	1	1	1	1	1	1	1	1
168	99.4048	1	1	1	1	1	1	1	1	1	1	1	1	1	1
169	99.4083	1	1	1	1	1	1	1	1	1	1	1	1	1	1
170	99.4118	1	1	1	1	1	1	1	1	1	1	1	1	1	1
171	99.4152	1	1	1	1	1	1	1	1	1	1	1	1	1	1
172	99.4186	1	1	1	1	1	1	1	1	1	1	1	1	1	1
173	99.422	1	1	1	1	1	1	1	1	1	1	1	1	1	1
174	99.4253	1	1	1	1	1	1	1	1	1	1	1	1	1	1
175	99.4286	1	1	1	1	1	1	1	1	1	1	1	1	1	1
176	99.4318	1	1	1	1	1	1	1	1	1	1	1	1	1	1
177	99.435	1	1	1	1	1	1	1	1	1	1	1	1	1	1
178	99.4382	1	1	1	1	1	1	1	1	1	1	1	1	1	1
179	99.4413	1	1	1	1	1	1	1	1	1	1	1	1	1	1
180	99.4444	1	1	1	1	1	1	1	1	1	1	1	1	1	1
181	99.4475	1	1	1	1	1	1	1	1	1	1	1	1	1	1
182	99.4505	1	1	1	1	1	1	1	1	1	1	1	1	1	1
183	99.4536	1	1	1	1	1	1	1	1	1	1	1	1	1	1
184	99.4565	1	1	1	1	1	1	1	1	1	1	1	1	1	1
185	99.4595	1	1	1	1	1	1	1	1	1	1	1	1	1	1
186	99.4624	1	1	1	1	1	1	1	1	1	1	1	1	1	1
187	99.4652	1	1	1	1	1	1	1	1	1	1	1	1	1	1
188	99.4681	1	1	1	1	1	1	1	1	1	1	1	1	1	1
189	99.4709	1	1	1	1	1	1	1	1	1	1	1	1	1	1
190	99.4737	1	1	1	1	1	1	1	1	1	1	1	1	1	1
191	99.4764	1	1	1	1	1	1	1	1	1	1	1	1	1	1
192	99.4792	1	1	1	1	1	1	1	1	1	1	1	1	1	1
193	99.4819	1	1	1	1	1	1	1	1	1	1	1	1	1	1
194	99.4845	1	1	1	1	1	1	1	1	1	1	1	1	1	1
195	99.4872	1	1	1	1	1	1	1	1	1	1	1	1	1	1
196	99.4898	1	1	1	1	1	1	1	1	1	1	1	1	1	1
197	99.4924	1	1	1	1	1	1	1	1	1	1	1	1	1	1
198	99.4949	1	1	1	1	1	1	1	1	1	1	1	1	1	1
199	99.4975	1	1	1	1	1	1	1	1	1	1	1	1	1	1
200	99.5	1	1	1	1	1	1	1	1	1	1	1	1	1	1
201	99.5025	1	1	1	1	1	1	1	1	1	1	1	1	1	1
202	99.505	1	1	1	1	1	1	1	1	1	1	1	1	1	1
203	99.5074	1	1	1	1	1	1	1	1	1	1	1	1	1	1
204	99.5098	1	1	1	1	1	1	1	1	1	1	1	1	1	1
205	99.5122	1	1	1	1	1	1	1	1	1	1	1	1	1	1
206	99.5146	1	1	1	1	1	1	1	1	1	1	1	1	1	1
207	99.5169	1	1	1	1	1	1	1	1	1	1	1	1	1	1
208	99.5192	1	1	1	1	1	1	1	1	1	1	1	1	1	1
209	99.5215	1	1	1	1	1	1	1	1	1	1	1	1	1	1
210	99.5238	1	1	1	1	1	1	1	1	1	1	1	1	1	1
211	99.5261	1	1	1	1	1	1	1	1	1	1	1	1	1	1
212	99.5283	1	1	1	1	1	1	1	1	1	1	1	1	1	1
213	99.5305	1	1	1	1	1	1	1	1	1	1	1	1	1	1
214	99.5327	1	1	1	1	1	1	1	1	1	1	1	1	1	1
215	99.5349	1	1	1	1	1	1	1	1	1	1	1	1	1	1
216	99.537	1	1	1	1	1	1	1	1	1	1	1	1	1	1
217	99.5392	1	1	1	1	1	1	1	1	1	1	1	1	1	1
218	99.5413	1	1	1	1	1	1	1	1	1	1	1	1	1	1
219	99.5434	1	1	1	1	1	1	1	1	1	1	1	1	1	1
220	99.5455	1	1	1	1	1	1	1	1	1	1	1	1	1	1
221	99.5475	1	1	1	1	1	1	1	1	1	1	1	1	1	1
222	99.5495	1	1	1	1	1	1	1	1	1	1	1	1	1	1
223	99.5516	1	1	1	1	1	1	1	1	1	1	1	1	1	1
224	99.5536	1	1	1	1	1	1	1	1	1	1	1	1	1	1
225	99.5556	1	1	1	1	1	1	1	1	1	1	1	1	1	1
226	99.5575	1	1	1	1	1	1	1	1	1	1	1	1	1	1
227	99.5595	1	1	1	1	1	1	1	1	1	1	1	1	1	1
228	99.5614	1	1	1	1	1	1	1	1	1	1	1	1	1	1
229	99.5633	1	1	1	1	1	1	1	1	1	1	1	1	1	1
230	99.5652	1	1	1	1	1	1	1	1	1	1	1	1	1	1
231	99.5671	1	1	1	1	1	1	1	1	1	1	1	1	1	1
232	99.569	1	1	1	1	1	1	1	1	1	1	1	1	1	1
233	99.5708	1	1	1	1	1	1	1	1	1	1	1	1	1	1
234	99.5726	1	1	1	1	1	1	1	1	1	1	1	1	1	1
235	99.5745	1	1	1	1	1	1	1	1	1	1	1	1	1	1
236	99.5763	1	1	1	1	1	1	1	1	1	1	1	1	1	1
237	99.5781	1	1	1	1	1	1	1	1	1	1	1	1	1	1
238	99.5798	1	1	1	1	1	1	1	1	1	1	1	1	1	1
239	99.5816	1	1	1	1	1	1	1	1	1	1	1	1	1	1
240	99.5833	1	1	1	1	1	1	1	1	1	1	1	1	1	1
241	99.5851	1	1	1	1	1	1	1	1	1	1	1	1	1	1
242	99.5868	1	1	1	1	1	1	1	1	1	1	1	1	1	1
243	99.5885	1	1	1	1	1	1	1	1	1	1	1	1	1	1
244	99.5902	1	1	1	1	1	1	1	1	1	1	1	1	1	1
245	99.5918	1	1	1	1	1	1	1	1	1	1	1	1	1	1
246	99.5935	1	1	1	1	1	1	1	1	1	1	1	1	1	1
247	99.5951	1	1	1	1	1	1	1	1	1	1	1	1	1	1
248	99.5968	1	1	1	1	1	1	1	1	1	1	1	1	1	1
249	99.5984	1	1	1	1	1	1	1	1	1	1	1	1	1	1
250	99.6	1	1	1	1	1	1	1	1	1	1	1	1	1	1

## Sheet: 10K
Simulation Setting: 50X coverage of reads. Single end read; read length 250. Two sequences differ for X %ID as below																	Pearson's r	p-value
		Result / Number of Contigs															0.4504-0.7874	<0.0001
		10K															Spearman ρ	p-value
Mutation		GC20%	GC25%	GC30%	GC35%	GC40%	GC45%	GC50%	GC55%	GC60%	GC65%	GC70%	GC75%	GC80%	AVERAGE		0.9487-0.9801	<0.0001
1 change in	%ID	#	#	#	#	#	#	#	#	#	#	#	#	#	# of contigs
4	75	2	2	2	2	2	2	2	2	2	2	2	2	2	2
5	80	2	2	2	2	2	2	2	2	2	2	2	2	2	2
6	83.3333	2	2	2	2	2	2	2	2	2	2	2	2	2	2
7	85.7143	2	2	2	2	2	2	2	2	2	2	2	2	2	2
8	87.5	2	2	2	2	2	2	2	2	2	2	2	2	2	2
9	88.8889	2	2	2	2	2	2	2	2	2	2	2	2	2	2
10	90	2	2	2	2	2	2	2	2	2	2	2	2	2	2
11	90.9091	2	2	2	2	2	2	2	2	2	2	2	2	2	2
12	91.6667	2	2	2	2	2	2	2	2	2	2	2	2	2	2
13	92.3077	2	2	2	2	2	2	2	2	2	2	2	2	2	2
14	92.8571	2	2	2	2	2	2	2	2	2	2	2	2	2	2
15	93.3333	2	2	2	2	2	2	2	2	2	2	2	2	2	2
16	93.75	2	2	2	2	2	2	2	2	2	2	2	2	2	2
17	94.1176	2	2	2	2	2	2	2	2	2	2	2	2	2	2
18	94.4444	2	2	2	2	2	2	2	2	2	2	2	2	2	2
19	94.7368	2	2	2	2	2	2	2	2	2	2	2	2	2	2
20	95	2	2	2	2	2	2	2	2	2	2	2	2	2	2
21	95.2381	2	2	2	2	2	2	2	2	2	2	2	2	2	2
22	95.4545	2	2	2	2	2	2	2	2	2	2	2	2	2	2
23	95.6522	3	2	2	2	2	2	2	2	2	2	2	2	2	2.07692
24	95.8333	2	2	2	2	2	2	2	2	2	2	2	2	2	2
25	96	2	2	2	2	2	2	2	2	2	2	2	2	2	2
26	96.1538	2	2	2	2	2	3	2	3	2	2	2	2	2	2.15385
27	96.2963	2	2	2	2	2	2	2	2	2	2	2	2	2	2
28	96.4286	2	2	2	2	2	2	2	2	2	2	2	2	2	2
29	96.5517	2	2	2	2	2	3	2	2	2	2	2	2	2	2.07692
30	96.6667	2	2	2	3	2	2	2	2	2	2	2	2	2	2.07692
31	96.7742	2	2	2	2	2	3	2	2	2	2	2	2	2	2.07692
32	96.875	2	2	2	2	2	2	2	2	2	2	2	2	2	2
33	96.9697	2	2	2	2	2	2	2	2	2	2	2	2	2	2
34	97.0588	2	2	2	2	2	2	2	2	2	2	2	2	2	2
35	97.1429	2	3	2	2	2	2	2	2	2	2	3	2	2	2.15385
36	97.2222	2	2	2	2	3	2	2	2	2	2	2	2	2	2.07692
37	97.2973	2	2	2	2	2	2	2	4	2	2	3	2	2	2.23077
38	97.3684	2	2	2	2	2	2	2	2	2	2	2	2	2	2
39	97.4359	2	2	2	2	2	2	2	2	2	2	3	2	2	2.07692
40	97.5	2	2	2	2	2	2	2	2	2	2	2	2	2	2
41	97.561	2	2	2	2	2	2	2	2	2	2	2	2	2	2
42	97.619	2	2	2	2	2	2	2	2	2	2	2	2	2	2
43	97.6744	2	2	2	2	2	2	2	2	2	2	2	2	2	2
44	97.7273	2	2	2	2	2	2	2	2	2	2	2	2	2	2
45	97.7778	2	3	2	2	2	2	2	2	2	2	2	3	2	2.15385
46	97.8261	2	2	3	2	2	2	2	2	2	2	3	2	2	2.15385
47	97.8723	2	2	2	2	2	2	2	3	2	2	2	2	2	2.07692
48	97.9167	3	2	2	2	3	2	2	2	2	2	2	2	2	2.15385
49	97.9592	2	2	2	2	2	2	2	2	2	2	3	2	2	2.07692
50	98	2	2	2	2	3	2	3	2	2	2	2	2	2	2.15385
51	98.0392	2	2	2	2	2	2	2	2	2	2	2	2	2	2
52	98.0769	2	2	2	2	2	2	2	2	2	2	2	2	2	2
53	98.1132	2	2	2	2	2	2	2	2	2	2	2	2	2	2
54	98.1481	2	2	2	2	2	2	2	2	2	2	3	2	2	2.07692
55	98.1818	2	2	2	2	2	2	2	2	2	2	2	2	2	2
56	98.2143	2	2	2	2	2	2	2	2	2	2	2	2	2	2
57	98.2456	2	2	2	2	2	2	3	2	2	2	2	2	2	2.07692
58	98.2759	2	2	2	2	2	2	2	2	2	2	2	2	2	2
59	98.3051	2	2	2	2	2	2	3	2	2	2	2	2	2	2.07692
60	98.3333	2	2	3	2	2	2	3	2	2	2	2	2	2	2.15385
61	98.3607	2	2	2	2	2	2	2	2	2	2	2	2	2	2
62	98.3871	2	2	2	3	2	2	2	2	2	2	2	2	2	2.07692
63	98.4127	2	2	2	2	3	2	2	2	2	2	2	2	2	2.07692
64	98.4375	2	3	2	2	2	2	3	3	2	2	2	2	2	2.23077
65	98.4615	2	2	2	2	2	2	2	2	2	2	2	2	3	2.07692
66	98.4848	2	2	2	3	2	2	2	2	2	2	2	2	2	2.07692
67	98.5075	2	2	3	2	2	2	2	2	2	2	2	2	2	2.07692
68	98.5294	2	2	2	2	2	2	2	2	3	2	2	2	2	2.07692
69	98.5507	2	2	3	2	2	2	3	2	2	2	2	2	2	2.15385
70	98.5714	2	2	2	2	2	2	2	3	2	2	3	2	2	2.15385
71	98.5915	2	2	2	2	2	2	2	2	2	2	2	2	2	2
72	98.6111	2	3	2	2	2	2	2	3	2	2	2	2	2	2.15385
73	98.6301	2	2	2	2	2	2	2	2	2	3	2	2	2	2.07692
74	98.6486	2	2	2	2	2	2	2	2	3	2	2	2	2	2.07692
75	98.6667	2	2	2	2	3	2	2	2	2	2	2	2	2	2.07692
76	98.6842	2	2	2	2	2	2	2	2	3	3	2	2	3	2.23077
77	98.7013	2	2	3	2	2	2	2	2	2	2	2	2	3	2.15385
78	98.7179	3	2	2	2	2	2	2	2	2	2	2	2	2	2.07692
79	98.7342	2	2	2	2	2	2	2	2	2	2	2	2	2	2
80	98.75	2	2	2	2	2	2	2	2	2	2	2	2	2	2
81	98.7654	2	2	2	2	2	3	2	2	2	2	2	2	2	2.07692
82	98.7805	3	2	2	2	2	2	2	2	2	2	2	2	2	2.07692
83	98.7952	2	2	2	2	2	2	2	2	3	2	2	2	2	2.07692
84	98.8095	2	2	2	2	2	2	2	2	2	2	2	2	2	2
85	98.8235	2	2	2	2	2	2	3	2	2	2	2	2	3	2.15385
86	98.8372	2	2	2	2	2	2	2	2	2	2	2	2	2	2
87	98.8506	2	2	2	2	2	2	3	2	2	2	2	2	2	2.07692
88	98.8636	2	2	2	5	2	2	2	2	2	2	2	2	2	2.23077
89	98.8764	2	2	2	2	2	2	2	2	2	2	2	2	2	2
90	98.8889	2	2	2	2	2	2	2	2	2	2	2	2	2	2
91	98.9011	3	2	3	2	2	2	2	2	2	2	2	2	2	2.15385
92	98.913	2	2	2	2	2	2	2	2	2	2	2	2	2	2
93	98.9247	2	2	2	2	3	2	2	2	2	2	2	2	2	2.07692
94	98.9362	3	2	2	2	2	2	2	2	2	2	2	2	2	2.07692
95	98.9474	2	2	2	3	2	2	2	2	2	2	2	2	2	2.07692
96	98.9583	5	3	2	2	2	2	2	2	2	2	2	2	2	2.30769
97	98.9691	2	2	2	2	2	2	2	2	2	2	2	2	2	2
98	98.9796	2	2	2	2	2	2	2	2	2	2	2	2	2	2
99	98.9899	2	2	2	2	2	2	2	2	2	2	2	2	2	2
100	99	3	14	5	2	8	5	2	5	2	8	9	9	5	5.92308
101	99.0099	5	2	2	8	12	5	11	10	8	8	14	2	14	7.76923
102	99.0196	2	15	5	2	2	5	2	5	4	8	8	5	2	5
103	99.0291	2	5	8	15	4	2	8	2	11	2	9	2	2	5.53846
104	99.0385	9	12	2	7	11	2	2	7	8	8	8	11	11	7.53846
105	99.0476	2	8	8	2	11	11	2	11	12	2	8	2	5	6.46154
106	99.0566	9	2	11	8	11	6	8	13	2	5	8	9	6	7.53846
107	99.0654	2	13	14	4	2	6	16	6	14	2	11	7	5	7.84615
108	99.0741	5	11	9	2	8	11	2	2	2	10	7	8	20	7.46154
109	99.0826	5	9	12	8	2	17	11	11	10	11	18	10	2	9.69231
110	99.0909	15	13	17	11	4	12	9	8	12	2	7	2	8	9.23077
111	99.0991	5	5	2	13	2	11	11	10	13	16	2	8	2	7.69231
112	99.1071	16	2	10	2	9	12	16	11	2	8	2	2	2	7.23077
113	99.115	2	8	9	12	11	2	11	9	14	2	8	11	2	7.76923
114	99.1228	7	17	9	13	2	2	11	10	9	2	14	11	2	8.38462
115	99.1304	14	10	2	14	2	17	8	2	11	8	15	14	2	9.15385
116	99.1379	2	14	2	15	8	15	20	18	8	2	11	8	5	9.84615
117	99.1453	2	14	2	15	2	13	10	7	10	14	11	2	10	8.61538
118	99.1525	2	8	5	16	9	12	2	11	11	11	10	8	14	9.15385
119	99.1597	6	14	16	2	13	2	9	17	8	2	2	17	11	9.15385
120	99.1667	2	2	17	12	2	8	12	17	11	2	14	2	11	8.61538
121	99.1736	2	5	8	3	12	8	13	2	15	14	13	14	11	9.23077
122	99.1803	12	2	2	8	8	13	2	14	8	2	2	9	2	6.46154
123	99.187	6	19	2	19	2	2	2	11	18	12	8	11	14	9.69231
124	99.1935	17	8	11	15	9	11	8	17	2	13	11	11	14	11.3077
125	99.2	2	8	12	11	3	2	11	2	2	17	2	2	16	6.92308
126	99.2063	11	2	2	2	2	14	2	11	9	2	11	5	8	6.23077
127	99.2126	13	16	8	14	14	9	11	2	2	5	9	8	14	9.61538
128	99.2188	1	1	1	1	1	1	1	1	1	1	1	1	1	1
129	99.2248	1	1	1	1	1	1	1	1	1	1	1	1	1	1
130	99.2308	1	1	1	1	1	1	1	1	1	1	1	1	1	1
131	99.2366	1	1	1	1	1	1	1	1	1	1	1	1	1	1
132	99.2424	1	1	1	1	1	1	1	1	1	1	1	1	1	1
133	99.2481	1	1	1	1	1	1	1	1	1	1	1	1	1	1
134	99.2537	1	1	1	1	1	1	1	1	1	1	1	1	1	1
135	99.2593	1	1	1	1	1	1	1	1	1	1	1	1	1	1
136	99.2647	1	1	1	1	1	1	1	1	1	1	1	1	1	1
137	99.2701	1	1	1	1	1	1	1	1	1	1	1	1	1	1
138	99.2754	1	1	1	1	1	1	1	1	1	1	1	1	1	1
139	99.2806	1	1	1	1	1	1	1	1	1	1	1	1	1	1
140	99.2857	1	1	1	1	1	1	1	1	1	1	1	1	1	1
141	99.2908	1	1	1	1	1	1	1	1	1	1	1	1	1	1
142	99.2958	1	1	1	1	1	1	1	1	1	1	1	1	1	1
143	99.3007	1	1	1	1	1	1	1	1	1	1	1	1	1	1
144	99.3056	1	1	1	1	1	1	1	1	1	1	1	1	1	1
145	99.3103	1	1	1	1	1	1	1	1	1	1	1	1	1	1
146	99.3151	1	1	1	1	1	1	1	1	1	1	1	1	1	1
147	99.3197	1	1	1	1	1	1	1	1	1	1	1	1	1	1
148	99.3243	1	1	1	1	1	1	1	1	1	1	1	1	1	1
149	99.3289	1	1	1	1	1	1	1	1	1	1	1	1	1	1
150	99.3333	1	1	1	1	1	1	1	1	1	1	1	1	1	1
151	99.3377	1	1	1	1	1	1	1	1	1	1	1	1	1	1
152	99.3421	1	1	1	1	1	1	1	1	1	1	1	1	1	1
153	99.3464	1	1	1	1	1	1	1	1	1	1	1	1	1	1
154	99.3506	1	1	1	1	1	1	1	1	1	1	1	1	1	1
155	99.3548	1	1	1	1	1	1	1	1	1	1	1	1	1	1
156	99.359	1	1	1	1	1	1	1	1	1	1	1	1	1	1
157	99.3631	1	1	1	1	1	1	1	1	1	1	1	1	1	1
158	99.3671	1	1	1	1	1	1	1	1	1	1	1	1	1	1
159	99.3711	1	1	1	1	1	1	1	1	1	1	1	1	1	1
160	99.375	1	1	1	1	1	1	1	1	1	1	1	1	1	1
161	99.3789	1	1	1	1	1	1	1	1	1	1	1	1	1	1
162	99.3827	1	1	1	1	1	1	1	1	1	1	1	1	1	1
163	99.3865	1	1	1	1	1	1	1	1	1	1	1	1	1	1
164	99.3902	1	1	1	1	1	1	1	1	1	1	1	1	1	1
165	99.3939	1	1	1	1	1	1	1	1	1	1	1	1	1	1
166	99.3976	1	1	1	1	1	1	1	1	1	1	1	1	1	1
167	99.4012	1	1	1	1	1	1	1	1	1	1	1	1	1	1
168	99.4048	1	1	1	1	1	1	1	1	1	1	1	1	1	1
169	99.4083	1	1	1	1	1	1	1	1	1	1	1	1	1	1
170	99.4118	1	1	1	1	1	1	1	1	1	1	1	1	1	1
171	99.4152	1	1	1	1	1	1	1	1	1	1	1	1	1	1
172	99.4186	1	1	1	1	1	1	1	1	1	1	1	1	1	1
173	99.422	1	1	1	1	1	1	1	1	1	1	1	1	1	1
174	99.4253	1	1	1	1	1	1	1	1	1	1	1	1	1	1
175	99.4286	1	1	1	1	1	1	1	1	1	1	1	1	1	1
176	99.4318	1	1	1	1	1	1	1	1	1	1	1	1	1	1
177	99.435	1	1	1	1	1	1	1	1	1	1	1	1	1	1
178	99.4382	1	1	1	1	1	1	1	1	1	1	1	1	1	1
179	99.4413	1	1	1	1	1	1	1	1	1	1	1	1	1	1
180	99.4444	1	1	1	1	1	1	1	1	1	1	1	1	1	1
181	99.4475	1	1	1	1	1	1	1	1	1	1	1	1	1	1
182	99.4505	1	1	1	1	1	1	1	1	1	1	1	1	1	1
183	99.4536	1	1	1	1	1	1	1	1	1	1	1	1	1	1
184	99.4565	1	1	1	1	1	1	1	1	1	1	1	1	1	1
185	99.4595	1	1	1	1	1	1	1	1	1	1	1	1	1	1
186	99.4624	1	1	1	1	1	1	1	1	1	1	1	1	1	1
187	99.4652	1	1	1	1	1	1	1	1	1	1	1	1	1	1
188	99.4681	1	1	1	1	1	1	1	1	1	1	1	1	1	1
189	99.4709	1	1	1	1	1	1	1	1	1	1	1	1	1	1
190	99.4737	1	1	1	1	1	1	1	1	1	1	1	1	1	1
191	99.4764	1	1	1	1	1	1	1	1	1	1	1	1	1	1
192	99.4792	1	1	1	1	1	1	1	1	1	1	1	1	1	1
193	99.4819	1	1	1	1	1	1	1	1	1	1	1	1	1	1
194	99.4845	1	1	1	1	1	1	1	1	1	1	1	1	1	1
195	99.4872	1	1	1	1	1	1	1	1	1	1	1	1	1	1
196	99.4898	1	1	1	1	1	1	1	1	1	1	1	1	1	1
197	99.4924	1	1	1	1	1	1	1	1	1	1	1	1	1	1
198	99.4949	1	1	1	1	1	1	1	1	1	1	1	1	1	1
199	99.4975	1	1	1	1	1	1	1	1	1	1	1	1	1	1
200	99.5	1	1	1	1	1	1	1	1	1	1	1	1	1	1
201	99.5025	1	1	1	1	1	1	1	1	1	1	1	1	1	1
202	99.505	1	1	1	1	1	1	1	1	1	1	1	1	1	1
203	99.5074	1	1	1	1	1	1	1	1	1	1	1	1	1	1
204	99.5098	1	1	1	1	1	1	1	1	1	1	1	1	1	1
205	99.5122	1	1	1	1	1	1	1	1	1	1	1	1	1	1
206	99.5146	1	1	1	1	1	1	1	1	1	1	1	1	1	1
207	99.5169	1	1	1	1	1	1	1	1	1	1	1	1	1	1
208	99.5192	1	1	1	1	1	1	1	1	1	1	1	1	1	1
209	99.5215	1	1	1	1	1	1	1	1	1	1	1	1	1	1
210	99.5238	1	1	1	1	1	1	1	1	1	1	1	1	1	1
211	99.5261	1	1	1	1	1	1	1	1	1	1	1	1	1	1
212	99.5283	1	1	1	1	1	1	1	1	1	1	1	1	1	1
213	99.5305	1	1	1	1	1	1	1	1	1	1	1	1	1	1
214	99.5327	1	1	1	1	1	1	1	1	1	1	1	1	1	1
215	99.5349	1	1	1	1	1	1	1	1	1	1	1	1	1	1
216	99.537	1	1	1	1	1	1	1	1	1	1	1	1	1	1
217	99.5392	1	1	1	1	1	1	1	1	1	1	1	1	1	1
218	99.5413	1	1	1	1	1	1	1	1	1	1	1	1	1	1
219	99.5434	1	1	1	1	1	1	1	1	1	1	1	1	1	1
220	99.5455	1	1	1	1	1	1	1	1	1	1	1	1	1	1
221	99.5475	1	1	1	1	1	1	1	1	1	1	1	1	1	1
222	99.5495	1	1	1	1	1	1	1	1	1	1	1	1	1	1
223	99.5516	1	1	1	1	1	1	1	1	1	1	1	1	1	1
224	99.5536	1	1	1	1	1	1	1	1	1	1	1	1	1	1
225	99.5556	1	1	1	1	1	1	1	1	1	1	1	1	1	1
226	99.5575	1	1	1	1	1	1	1	1	1	1	1	1	1	1
227	99.5595	1	1	1	1	1	1	1	1	1	1	1	1	1	1
228	99.5614	1	1	1	1	1	1	1	1	1	1	1	1	1	1
229	99.5633	1	1	1	1	1	1	1	1	1	1	1	1	1	1
230	99.5652	1	1	1	1	1	1	1	1	1	1	1	1	1	1
231	99.5671	1	1	1	1	1	1	1	1	1	1	1	1	1	1
232	99.569	1	1	1	1	1	1	1	1	1	1	1	1	1	1
233	99.5708	1	1	1	1	1	1	1	1	1	1	1	1	1	1
234	99.5726	1	1	1	1	1	1	1	1	1	1	1	1	1	1
235	99.5745	1	1	1	1	1	1	1	1	1	1	1	1	1	1
236	99.5763	1	1	1	1	1	1	1	1	1	1	1	1	1	1
237	99.5781	1	1	1	1	1	1	1	1	1	1	1	1	1	1
238	99.5798	1	1	1	1	1	1	1	1	1	1	1	1	1	1
239	99.5816	1	1	1	1	1	1	1	1	1	1	1	1	1	1
240	99.5833	1	1	1	1	1	1	1	1	1	1	1	1	1	1
241	99.5851	1	1	1	1	1	1	1	1	1	1	1	1	1	1
242	99.5868	1	1	1	1	1	1	1	1	1	1	1	1	1	1
243	99.5885	1	1	1	1	1	1	1	1	1	1	1	1	1	1
244	99.5902	1	1	1	1	1	1	1	1	1	1	1	1	1	1
245	99.5918	1	1	1	1	1	1	1	1	1	1	1	1	1	1
246	99.5935	1	1	1	1	1	1	1	1	1	1	1	1	1	1
247	99.5951	1	1	1	1	1	1	1	1	1	1	1	1	1	1
248	99.5968	1	1	1	1	1	1	1	1	1	1	1	1	1	1
249	99.5984	1	1	1	1	1	1	1	1	1	1	1	1	1	1
250	99.6	1	1	1	1	1	1	1	1	1	1	1	1	1	1

## Sheet: 100K
Simulation Setting: 50X coverage of reads. Single end read; read length 250. Two sequences differ for X %ID as below																	Pearson's r	p-value
		Result / Number of Contigs															0.9608-0.9870	<0.0001
		100k															Spearman ρ	p-value
Mutation		GC20%	GC25%	GC30%	GC35%	GC40%	GC45%	GC50%	GC55%	GC60%	GC65%	GC70%	GC75%	GC80%	AVERAGE		0.9135-0.9680	<0.0001
1 change in	%ID	#	#	#	#	#	#	#	#	#	#	#	#	#	# of contigs
4	75	2	2	2	2	2	2	2	2	2	2	2	2	2	2
5	80	2	2	2	2	2	2	2	2	2	0	0	2	2	1.69231
6	83.3333	2	2	2	2	2	2	2	2	2	2	2	2	2	2
7	85.7143	2	2	2	2	2	2	2	2	2	2	2	2	2	2
8	87.5	2	2	2	2	2	2	2	2	2	2	2	2	0	1.84615
9	88.8889	2	2	2	2	2	2	2	2	2	2	2	2	2	2
10	90	2	2	2	2	2	2	2	2	2	2	2	2	2	2
11	90.9091	2	2	2	2	2	2	2	2	2	2	2	2	2	2
12	91.6667	2	2	2	2	2	2	2	2	2	2	2	2	2	2
13	92.3077	2	2	2	2	2	2	2	2	2	2	2	2	2	2
14	92.8571	2	2	2	2	2	2	2	2	2	2	2	2	2	2
15	93.3333	2	2	2	2	2	2	2	2	2	2	2	2	2	2
16	93.75	2	2	2	2	2	2	2	2	2	2	2	2	2	2
17	94.1176	2	2	2	2	2	2	2	2	2	2	2	2	2	2
18	94.4444	2	2	2	2	2	2	2	2	2	2	2	2	2	2
19	94.7368	2	2	2	2	2	2	2	2	2	2	2	2	2	2
20	95	2	2	2	2	2	2	2	2	2	2	2	2	2	2
21	95.2381	2	3	2	2	2	2	2	2	3	2	2	2	2	2.15385
22	95.4545	2	3	2	2	2	2	3	2	2	2	2	2	2	2.15385
23	95.6522	2	2	2	2	4	2	2	2	4	2	2	2	2	2.30769
24	95.8333	2	2	2	2	3	2	2	2	2	2	2	2	2	2.07692
25	96	2	2	2	2	2	2	2	2	2	2	2	3	2	2.07692
26	96.1538	2	2	3	2	3	3	2	2	2	3	3	4	2	2.53846
27	96.2963	5	3	3	4	3	2	2	2	3	2	3	2	3	2.84615
28	96.4286	2	3	3	2	2	2	3	2	2	3	3	2	2	2.38462
29	96.5517	2	2	4	3	2	2	2	2	2	2	2	3	2	2.30769
30	96.6667	3	2	2	2	3	2	2	3	3	2	2	2	2	2.30769
31	96.7742	3	2	2	3	2	2	3	3	2	2	2	2	2	2.30769
32	96.875	2	2	2	2	2	2	2	3	2	2	2	2	2	2.07692
33	96.9697	2	2	2	3	2	2	2	3	2	2	2	2	3	2.23077
34	97.0588	2	3	2	3	5	2	2	2	2	4	3	2	3	2.69231
35	97.1429	2	2	4	2	2	2	3	2	2	2	3	2	3	2.38462
36	97.2222	4	2	3	2	3	3	2	2	2	3	2	2	3	2.53846
37	97.2973	2	2	2	4	3	2	2	3	2	2	3	3	2	2.46154
38	97.3684	3	2	3	2	2	2	2	4	2	3	3	2	2	2.46154
39	97.4359	2	3	3	2	2	2	5	2	2	2	2	4	4	2.69231
40	97.5	3	2	2	3	3	2	3	2	2	3	2	2	3	2.46154
41	97.561	2	2	2	2	3	2	2	3	2	2	3	4	2	2.38462
42	97.619	2	3	2	3	2	2	3	2	2	2	2	2	2	2.23077
43	97.6744	2	2	3	4	3	3	3	4	4	4	7	3	2	3.38462
44	97.7273	3	5	2	2	3	3	4	3	3	2	3	2	2	2.84615
45	97.7778	2	3	2	2	2	2	2	4	3	3	3	2	3	2.53846
46	97.8261	2	3	2	2	3	3	2	3	3	4	2	3	3	2.69231
47	97.8723	3	3	3	2	3	2	2	4	4	2	2	2	2	2.61538
48	97.9167	2	2	3	3	2	2	3	4	2	2	2	2	4	2.53846
49	97.9592	3	2	2	2	2	2	5	2	2	2	3	2	2	2.38462
50	98	4	3	3	2	3	2	2	2	4	3	2	2	2	2.61538
51	98.0392	2	2	3	3	3	2	3	2	3	3	5	2	2	2.69231
52	98.0769	3	2	2	2	2	2	3	2	3	2	3	2	2	2.30769
53	98.1132	3	2	3	5	2	2	3	2	2	4	2	2	4	2.76923
54	98.1481	3	3	3	2	4	2	4	3	2	2	2	3	4	2.84615
55	98.1818	4	3	3	2	2	2	3	3	2	2	4	3	3	2.76923
56	98.2143	3	3	3	4	4	2	3	2	4	3	2	2	3	2.92308
57	98.2456	2	3	2	2	2	2	2	2	6	4	2	2	2	2.53846
58	98.2759	3	4	2	5	2	2	2	2	2	3	2	2	2	2.53846
59	98.3051	2	2	2	2	2	2	2	3	2	3	2	2	2	2.15385
60	98.3333	3	2	4	4	2	2	2	4	2	3	3	3	3	2.84615
61	98.3607	2	3	2	4	2	3	2	2	2	2	2	2	3	2.38462
62	98.3871	2	3	2	2	2	4	3	2	3	2	2	2	4	2.53846
63	98.4127	2	2	3	2	2	4	3	4	2	3	2	2	2	2.53846
64	98.4375	5	3	2	3	3	3	2	2	3	4	3	2	2	2.84615
65	98.4615	2	2	4	5	3	2	3	2	2	2	3	3	2	2.69231
66	98.4848	2	2	2	3	2	2	5	3	3	3	4	4	3	2.92308
67	98.5075	2	2	2	2	2	3	3	5	2	5	6	3	2	3
68	98.5294	3	2	4	2	4	3	3	3	2	3	2	2	4	2.84615
69	98.5507	2	2	2	2	4	3	4	2	3	3	3	2	2	2.61538
70	98.5714	2	3	2	2	6	2	6	2	3	2	3	3	3	3
71	98.5915	4	2	2	3	2	4	4	3	2	5	4	2	4	3.15385
72	98.6111	2	2	3	3	2	2	3	3	4	4	2	3	3	2.76923
73	98.6301	2	5	3	4	2	2	2	3	2	2	2	2	2	2.53846
74	98.6486	2	3	3	4	4	3	3	2	3	2	2	2	3	2.76923
75	98.6667	3	2	2	2	3	3	2	3	3	5	2	3	3	2.76923
76	98.6842	3	2	3	2	3	5	5	2	4	2	6	5	2	3.38462
77	98.7013	2	2	3	2	3	3	5	3	5	2	3	3	2	2.92308
78	98.7179	4	3	3	2	2	5	4	2	2	2	2	4	3	2.92308
79	98.7342	2	7	2	2	2	2	3	2	4	4	4	4	3	3.15385
80	98.75	3	3	3	2	2	5	2	2	3	2	3	3	2	2.69231
81	98.7654	2	2	2	3	4	3	3	5	3	3	2	2	6	3.07692
82	98.7805	2	3	5	3	3	2	2	2	2	2	3	4	3	2.76923
83	98.7952	2	2	4	2	2	2	2	3	2	3	2	2	2	2.30769
84	98.8095	3	2	4	3	3	3	2	2	5	2	2	2	3	2.76923
85	98.8235	2	3	2	2	3	5	2	4	3	3	5	3	5	3.23077
86	98.8372	3	3	8	3	4	2	2	2	2	6	2	2	4	3.30769
87	98.8506	4	3	2	3	4	2	2	2	2	2	3	3	2	2.61538
88	98.8636	4	3	3	3	2	3	2	4	3	3	3	4	6	3.30769
89	98.8764	3	3	2	2	2	2	3	2	2	3	3	2	2	2.38462
90	98.8889	4	2	2	3	3	2	2	2	3	2	2	4	2	2.53846
91	98.9011	2	2	2	2	2	2	2	2	3	2	2	3	2	2.15385
92	98.913	2	2	2	2	2	2	3	2	2	2	4	2	0	2.07692
93	98.9247	3	3	3	3	2	3	2	4	3	2	3	2	5	2.92308
94	98.9362	2	3	2	3	4	4	2	2	3	3	2	2	2	2.61538
95	98.9474	5	3	2	2	3	2	2	2	2	3	3	7	2	2.92308
96	98.9583	2	2	3	2	2	4	3	3	2	3	3	2	3	2.61538
97	98.9691	2	2	2	4	5	2	5	2	5	3	2	4	2	3.07692
98	98.9796	2	2	2	3	3	3	2	2	2	3	2	2	2	2.30769
99	98.9899	4	2	2	3	3	3	4	2	2	4	3	2	5	3
100	99	73	85	54	52	87	78	78	52	73	63	51	74	85	69.6154
101	99.0099	81	67	41	44	83	80	83	69	101	73	81	60	84	72.8462
102	99.0196	83	50	49	91	67	69	57	92	103	38	92	86	57	71.8462
103	99.0291	94	91	84	63	61	69	57	61	56	48	98	80	98	73.8462
104	99.0385	83	62	106	62	64	72	62	79	96	98	78	68	90	78.4615
105	99.0476	73	92	63	67	103	99	85	83	104	87	85	90	80	85.4615
106	99.0566	73	80	96	63	79	106	79	92	71	73	93	110	66	83.1538
107	99.0654	84	81	64	77	93	110	85	71	98	92	72	76	103	85.0769
108	99.0741	80	77	112	69	116	100	118	107	75	83	89	94	99	93.7692
109	99.0826	77	122	92	100	95	110	128	89	90	93	71	100	94	97
110	99.0909	118	75	72	104	105	86	100	81	85	118	100	77	88	93
111	99.0991	92	109	85	75	102	91	109	107	89	90	106	72	101	94.4615
112	99.1071	94	105	81	99	87	82	108	90	115	110	108	127	118	101.846
113	99.115	109	118	100	96	95	96	102	90	110	111	68	118	111	101.846
114	99.1228	81	110	83	114	122	103	141	122	96	115	114	94	92	106.692
115	99.1304	114	124	106	104	122	119	131	124	123	123	111	125	85	116.231
116	99.1379	92	91	119	87	102	124	142	119	129	105	131	110	104	111.923
117	99.1453	113	119	87	106	141	119	151	113	127	142	134	116	101	120.692
118	99.1525	120	128	107	89	105	120	118	130	129	119	100	100	130	115
119	99.1597	107	103	128	95	141	108	116	136	111	101	106	121	126	115.308
120	99.1667	108	146	137	119	106	119	95	106	110	111	134	120	128	118.385
121	99.1736	114	140	108	122	111	106	132	113	123	145	116	125	113	120.615
122	99.1803	136	138	125	121	139	119	111	128	141	141	121	110	113	126.385
123	99.187	119	114	101	123	129	125	147	131	128	111	126	121	122	122.846
124	99.1935	103	109	130	79	120	125	134	142	94	116	112	116	120	115.385
125	99.2	147	107	114	138	124	110	104	107	100	122	116	125	117	117.769
126	99.2063	94	113	110	126	114	146	101	84	127	122	99	114	126	113.538
127	99.2126	123	79	92	104	121	103	126	101	128	106	121	100	101	108.077
128	99.2188	1	1	1	1	1	1	1	1	1	1	1	1	1	1
129	99.2248	1	1	1	1	1	1	1	1	1	1	1	1	1	1
130	99.2308	1	1	1	1	1	1	1	1	1	1	1	1	1	1
131	99.2366	1	1	1	1	1	1	1	1	1	1	1	1	1	1
132	99.2424	1	1	1	1	1	1	1	1	1	1	1	1	1	1
133	99.2481	1	1	1	1	1	1	1	1	1	1	1	1	1	1
134	99.2537	1	1	1	1	1	1	1	1	1	1	1	1	1	1
135	99.2593	1	1	1	1	1	1	1	1	1	1	1	1	1	1
136	99.2647	1	1	1	1	1	1	1	1	1	1	1	1	1	1
137	99.2701	1	1	1	1	1	1	1	1	1	1	1	1	1	1
138	99.2754	1	1	1	1	1	1	1	1	1	1	1	1	1	1
139	99.2806	1	1	1	1	1	1	1	1	1	1	1	1	1	1
140	99.2857	1	1	1	1	1	1	1	1	1	1	1	1	1	1
141	99.2908	1	1	1	1	1	1	1	1	1	1	1	1	1	1
142	99.2958	1	1	1	1	1	1	1	1	1	1	1	1	1	1
143	99.3007	1	1	1	1	1	1	1	1	1	1	1	1	1	1
144	99.3056	1	1	1	1	1	1	1	1	1	1	1	1	1	1
145	99.3103	1	1	1	1	1	1	1	1	1	1	1	1	1	1
146	99.3151	1	1	1	1	1	1	1	1	1	1	1	1	1	1
147	99.3197	1	1	1	1	1	1	1	1	1	1	1	1	1	1
148	99.3243	1	1	1	1	1	1	1	1	1	1	1	1	1	1
149	99.3289	1	1	1	1	1	1	1	1	1	1	1	1	1	1
150	99.3333	1	1	1	1	1	1	1	1	1	1	1	1	1	1
151	99.3377	1	1	1	1	1	1	1	1	1	1	1	1	1	1
152	99.3421	1	1	1	1	1	1	1	1	1	1	1	1	1	1
153	99.3464	1	1	1	1	1	1	1	1	1	1	1	1	1	1
154	99.3506	1	1	1	1	1	1	1	1	1	1	1	1	1	1
155	99.3548	1	1	1	1	1	1	1	1	1	1	1	1	1	1
156	99.359	1	1	1	1	1	1	1	1	1	1	1	1	1	1
157	99.3631	1	1	1	1	1	1	1	1	1	1	1	1	1	1
158	99.3671	1	1	1	1	1	1	1	1	1	1	1	1	1	1
159	99.3711	1	1	1	1	1	1	1	1	1	1	1	1	1	1
160	99.375	1	1	1	1	1	1	1	1	1	1	1	1	1	1
161	99.3789	1	1	1	1	1	1	1	1	1	1	1	1	1	1
162	99.3827	1	1	1	1	1	1	1	1	1	1	1	1	1	1
163	99.3865	1	1	1	1	1	1	1	1	1	1	1	1	1	1
164	99.3902	1	1	1	1	1	1	1	1	1	1	1	1	1	1
165	99.3939	1	1	1	1	1	1	1	1	1	1	1	1	1	1
166	99.3976	1	1	1	1	1	1	1	1	1	1	1	1	1	1
167	99.4012	1	1	1	1	1	1	1	1	1	1	1	1	1	1
168	99.4048	1	1	1	1	1	1	1	1	1	1	1	1	1	1
169	99.4083	1	1	1	1	1	1	1	1	1	1	1	1	1	1
170	99.4118	1	1	1	1	1	1	1	1	1	1	1	1	1	1
171	99.4152	1	1	1	1	1	1	1	1	1	1	1	1	1	1
172	99.4186	1	1	1	1	1	1	1	1	1	1	1	1	1	1
173	99.422	1	1	1	1	1	1	1	1	1	1	1	1	1	1
174	99.4253	1	1	1	1	1	1	1	1	1	1	1	1	1	1
175	99.4286	1	1	1	1	1	1	1	1	1	1	1	1	1	1
176	99.4318	1	1	1	1	1	1	1	1	1	1	1	1	1	1
177	99.435	1	1	1	1	1	1	1	1	1	1	1	1	0	0.923077
178	99.4382	1	1	1	1	1	1	1	1	1	1	1	1	1	1
179	99.4413	1	1	1	1	1	1	1	1	1	1	1	1	1	1
180	99.4444	1	1	1	1	1	1	1	1	1	1	1	1	1	1
181	99.4475	1	1	1	1	1	1	1	1	1	1	1	1	1	1
182	99.4505	1	1	1	1	1	1	1	1	1	1	1	1	1	1
183	99.4536	1	1	1	1	1	1	1	1	1	1	1	1	1	1
184	99.4565	1	1	1	1	1	1	1	1	1	1	1	1	1	1
185	99.4595	1	1	1	1	1	1	1	1	1	1	1	1	1	1
186	99.4624	1	1	1	1	1	1	1	1	1	1	1	1	1	1
187	99.4652	1	1	1	1	1	1	1	1	1	1	1	1	1	1
188	99.4681	1	1	1	1	1	1	1	1	1	1	1	1	1	1
189	99.4709	1	1	1	1	1	1	1	1	1	1	1	1	1	1
190	99.4737	1	1	1	1	1	1	1	1	1	1	1	1	1	1
191	99.4764	1	1	1	1	1	1	1	1	1	1	1	1	1	1
192	99.4792	1	1	1	1	1	1	1	1	1	1	1	1	1	1
193	99.4819	1	1	1	1	1	1	1	1	1	1	1	1	1	1
194	99.4845	1	1	1	1	1	1	1	1	1	1	1	1	1	1
195	99.4872	1	1	1	1	1	1	1	1	1	1	1	1	1	1
196	99.4898	1	1	1	1	1	1	1	1	1	1	1	1	1	1
197	99.4924	1	1	1	1	1	1	1	1	1	1	1	1	1	1
198	99.4949	1	1	1	1	1	1	1	1	1	1	1	1	1	1
199	99.4975	1	1	1	1	1	1	1	1	1	1	1	1	1	1
200	99.5	1	1	1	1	1	1	1	1	1	1	1	1	1	1
201	99.5025	1	1	1	1	1	1	1	1	1	1	1	1	1	1
202	99.505	1	1	1	1	1	1	1	1	1	1	1	1	1	1
203	99.5074	1	1	1	1	1	1	1	1	1	1	1	1	1	1
204	99.5098	1	1	1	1	1	1	1	1	1	1	1	1	1	1
205	99.5122	1	1	1	1	1	1	1	1	1	1	1	1	1	1
206	99.5146	1	1	1	1	1	1	1	1	1	1	1	1	1	1
207	99.5169	1	1	1	1	1	1	1	1	1	1	1	1	1	1
208	99.5192	1	1	1	1	1	1	1	1	1	1	1	1	1	1
209	99.5215	1	1	1	1	1	1	1	1	1	1	1	1	1	1
210	99.5238	1	1	1	1	1	1	1	1	1	1	1	1	1	1
211	99.5261	1	1	1	1	1	1	1	1	1	1	1	1	1	1
212	99.5283	1	1	1	1	1	1	1	1	1	1	1	1	1	1
213	99.5305	1	1	1	1	1	1	1	1	1	1	1	1	1	1
214	99.5327	1	1	1	1	1	1	1	1	1	1	1	1	1	1
215	99.5349	1	1	1	1	1	1	1	1	1	1	1	1	1	1
216	99.537	1	1	1	1	1	1	1	1	1	1	1	1	1	1
217	99.5392	1	1	1	1	1	1	1	1	1	1	1	1	1	1
218	99.5413	1	1	1	1	1	1	1	1	1	1	1	1	1	1
219	99.5434	1	1	1	1	1	1	1	1	1	1	1	1	1	1
220	99.5455	1	1	1	1	1	1	1	1	1	1	1	1	1	1
221	99.5475	1	1	1	1	1	1	1	1	1	1	1	1	1	1
222	99.5495	1	1	1	1	1	1	1	1	1	1	1	1	1	1
223	99.5516	1	1	1	1	1	1	1	1	1	1	1	1	1	1
224	99.5536	1	1	1	1	1	1	1	1	1	1	1	1	1	1
225	99.5556	1	1	1	1	1	1	1	1	1	1	1	1	1	1
226	99.5575	1	1	1	1	1	1	1	1	1	1	1	1	1	1
227	99.5595	1	1	1	1	1	1	1	1	1	1	1	1	1	1
228	99.5614	1	1	1	1	1	1	1	1	1	1	1	1	1	1
229	99.5633	1	1	1	1	1	1	1	1	1	1	1	1	1	1
230	99.5652	1	1	1	1	1	1	1	1	1	1	1	1	1	1
231	99.5671	1	1	1	1	1	1	1	1	1	1	1	1	1	1
232	99.569	1	1	1	1	1	1	1	1	1	1	1	1	1	1
233	99.5708	1	1	1	1	1	1	1	1	1	1	1	1	1	1
234	99.5726	1	1	1	1	1	1	1	1	1	1	1	1	1	1
235	99.5745	1	1	1	1	1	1	1	1	1	1	1	1	1	1
236	99.5763	1	1	1	1	1	1	1	1	1	1	1	1	1	1
237	99.5781	1	1	1	1	1	1	1	1	1	1	1	1	1	1
238	99.5798	1	1	1	1	1	1	1	1	1	1	1	1	1	1
239	99.5816	1	1	1	1	1	1	1	1	1	1	1	1	1	1
240	99.5833	1	1	1	1	1	1	1	1	1	1	1	1	1	1
241	99.5851	1	1	1	1	1	1	1	1	1	1	1	1	1	1
242	99.5868	1	1	1	1	1	1	1	1	1	1	1	1	1	1
243	99.5885	1	1	1	1	1	1	1	1	1	1	1	1	1	1
244	99.5902	1	1	1	1	1	1	1	1	1	1	1	1	1	1
245	99.5918	1	1	1	1	1	1	1	1	1	1	1	1	1	1
246	99.5935	1	1	1	1	1	1	1	1	1	1	1	1	1	1
247	99.5951	1	1	1	1	1	1	1	1	1	1	1	1	1	1
248	99.5968	1	1	1	1	1	1	1	1	1	1	1	1	1	1
249	99.5984	1	1	1	1	1	1	1	1	1	1	1	1	1	1
250	99.6	1	1	1	1	1	1	1	1	1	1	1	1	1	1

## Sheet: 1M
Simulation Setting: 50X coverage of reads. Single end read; read length 250. Two sequences differ for X %ID as below																	Pearson's r	p-value
		Result / Number of Contigs															0.9498-0.9962	<0.0001
		1M															Spearman ρ	p-value
Mutation		GC20%	GC25%	GC30%	GC35%	GC40%	GC45%	GC50%	GC55%	GC60%	GC65%	GC70%	GC75%	GC80%	AVERAGE		0.8299-0.9697	<0.0001
1 change in	%ID	#	#	#	#	#	#	#	#	#	#	#	#	#	# of contigs
4	75	2	2	2	2	2	2	2	2	2	2	2	2	2	2
5	80	2	2	2	2	2	2	2	2	2	2	2	2	2	2
6	83.3333	2	2	2	2	2	2	2	2	2	2	2	2	2	2
7	85.7143	2	2	2	2	2	2	2	2	2	2	2	2	2	2
8	87.5	2	2	2	2	2	2	2	2	2	2	2	2	2	2
9	88.8889	2	2	2	2	2	2	2	2	2	2	2	2	2	2
10	90	2	2	2	2	2	2	2	2	2	2	2	2	2	2
11	90.9091	2	2	2	2	2	2	2	2	2	2	2	2	2	2
12	91.6667	0	2	2	2	2	2	2	2	2	2	2	2	2	1.84615
13	92.3077	2	2	2	2	2	2	2	2	2	2	2	2	2	2
14	92.8571	2	2	2	2	2	2	2	2	2	2	0	2	2	1.84615
15	93.3333	2	0	2	2	2	2	2	2	2	2	2	2	2	1.84615
16	93.75	2	2	2	2	2	2	2	2	2	2	2	2	2	2
17	94.1176	2	2	2	2	2	2	2	2	2	2	2	2	2	2
18	94.4444	2	2	2	2	2	2	2	2	2	2	2	2	2	2
19	94.7368	2	2	2	2	2	2	2	2	2	2	2	2	2	2
20	95	2	2	2	2	2	2	2	2	2	2	0	2	2	1.84615
21	95.2381	4	4	3	3	2	2	4	2	3	3	4	3	2	3
22	95.4545	2	3	2	5	3	3	3	3	3	3	3	2	2	2.84615
23	95.6522	2	3	2	3	3	6	5	7	2	3	3	5	3	3.61538
24	95.8333	0	5	6	4	6	3	2	3	2	3	2	2	4	3.23077
25	96	6	7	4	2	2	6	3	5	6	2	5	6	4	4.46154
26	96.1538	8	3	5	6	3	7	4	4	6	5	6	3	6	5.07692
27	96.2963	4	3	3	7	4	3	5	4	5	7	2	4	2	4.07692
28	96.4286	3	4	6	6	5	4	3	2	6	4	6	3	4	4.30769
29	96.5517	5	5	6	4	5	2	4	5	4	5	4	3	3	4.23077
30	96.6667	0	5	3	3	5	4	2	7	5	5	4	11	8	4.76923
31	96.7742	4	4	2	7	6	4	2	4	4	4	6	4	4	4.23077
32	96.875	2	3	7	2	11	3	8	2	4	2	3	5	4	4.30769
33	96.9697	5	3	3	7	3	2	4	3	3	9	3	4	3	4
34	97.0588	8	6	5	7	5	5	5	4	8	2	3	5	6	5.30769
35	97.1429	6	6	5	8	5	5	7	5	4	2	12	7	5	5.92308
36	97.2222	5	3	4	4	3	5	3	4	2	9	4	9	7	4.76923
37	97.2973	5	3	3	3	5	6	3	3	3	4	3	4	7	4
38	97.3684	3	4	5	6	8	4	5	3	7	4	7	4	4	4.92308
39	97.4359	6	2	2	5	6	4	4	6	3	3	3	3	8	4.23077
40	97.5	4	3	3	3	2	3	3	5	3	5	5	5	7	3.92308
41	97.561	6	7	5	9	5	4	3	5	6	3	4	6	4	5.15385
42	97.619	3	2	6	2	4	3	2	4	2	2	4	3	3	3.07692
43	97.6744	2	6	7	4	4	4	4	4	4	4	2	6	3	4.15385
44	97.7273	3	7	7	5	4	2	5	2	4	5	5	4	6	4.53846
45	97.7778	3	6	2	11	3	2	6	3	2	6	2	4	3	4.07692
46	97.8261	6	4	6	5	6	2	4	3	5	3	3	9	3	4.53846
47	97.8723	4	3	8	2	6	2	3	2	3	2	2	3	2	3.23077
48	97.9167	2	3	3	4	5	2	5	2	3	5	3	7	5	3.76923
49	97.9592	4	2	8	8	6	2	3	4	7	5	11	2	3	5
50	98	5	7	4	3	4	4	7	2	3	6	6	4	3	4.46154
51	98.0392	3	5	5	7	5	2	3	5	2	3	4	4	5	4.07692
52	98.0769	9	5	4	5	6	2	6	6	3	2	2	2	3	4.23077
53	98.1132	2	5	3	4	7	4	9	2	3	2	4	3	2	3.84615
54	98.1481	2	0	2	2	2	4	5	3	4	8	0	4	6	3.23077
55	98.1818	3	5	3	4	2	4	3	7	6	3	3	3	3	3.76923
56	98.2143	4	2	2	6	6	10	4	4	7	2	4	3	3	4.38462
57	98.2456	2	2	5	3	2	6	4	4	6	5	4	6	4	4.07692
58	98.2759	2	3	3	7	5	2	4	7	4	2	4	4	3	3.84615
59	98.3051	6	2	2	2	2	2	3	3	2	5	2	2	4	2.84615
60	98.3333	2	2	2	2	6	6	2	2	5	2	4	2	2	3
61	98.3607	3	2	2	2	2	2	5	3	6	3	7	4	3	3.38462
62	98.3871	2	3	7	4	4	2	6	7	7	2	6	5	3	4.46154
63	98.4127	5	3	7	4	2	5	2	2	2	2	2	2	4	3.23077
64	98.4375	4	2	7	4	7	7	9	2	4	2	2	7	2	4.53846
65	98.4615	4	5	5	8	3	7	5	8	4	2	7	6	5	5.30769
66	98.4848	6	7	4	4	2	6	2	4	6	6	2	7	2	4.46154
67	98.5075	7	4	5	5	4	2	2	15	4	5	7	2	2	4.92308
68	98.5294	5	9	6	8	4	7	2	9	5	5	3	3	3	5.30769
69	98.5507	6	7	8	2	2	7	10	11	10	9	4	5	8	6.84615
70	98.5714	2	8	6	3	2	7	7	4	9	3	4	5	5	5
71	98.5915	11	12	6	2	3	11	5	3	8	2	7	9	5	6.46154
72	98.6111	9	5	10	4	14	9	4	4	5	9	11	5	3	7.07692
73	98.6301	8	7	5	5	3	6	13	14	8	2	2	4	2	6.07692
74	98.6486	3	8	2	2	7	2	5	6	7	2	5	10	3	4.76923
75	98.6667	3	2	2	3	5	3	2	6	7	5	8	5	8	4.53846
76	98.6842	3	14	9	2	5	4	3	5	9	5	5	6	2	5.53846
77	98.7013	7	9	3	9	3	4	3	2	2	5	6	5	2	4.61538
78	98.7179	7	2	4	10	4	4	6	3	5	2	7	12	10	5.84615
79	98.7342	5	3	2	4	3	5	12	3	2	2	3	9	4	4.38462
80	98.75	3	8	6	11	7	5	4	7	3	5	8	2	5	5.69231
81	98.7654	0	4	6	4	2	12	5	3	4	4	4	4	9	4.69231
82	98.7805	4	5	8	7	3	9	7	11	7	3	2	5	3	5.69231
83	98.7952	3	6	8	2	2	4	6	6	3	3	5	3	10	4.69231
84	98.8095	3	6	3	8	4	6	8	2	2	5	4	8	10	5.30769
85	98.8235	10	6	4	10	3	2	2	12	7	2	7	5	2	5.53846
86	98.8372	5	7	11	3	5	8	8	2	4	8	4	4	10	6.07692
87	98.8506	10	10	10	5	3	2	12	8	5	9	3	9	5	7
88	98.8636	2	2	3	6	3	2	2	14	10	2	7	17	3	5.61538
89	98.8764	2	4	2	4	4	11	2	3	7	7	2	2	9	4.53846
90	98.8889	2	4	5	2	6	5	2	5	5	18	2	7	5	5.23077
91	98.9011	3	9	7	4	6	3	4	14	3	6	2	3	5	5.30769
92	98.913	12	5	10	2	2	4	4	6	7	9	2	6	9	6
93	98.9247	8	2	6	5	3	6	2	6	2	6	2	4	9	4.69231
94	98.9362	2	7	5	3	8	8	5	6	4	4	4	5	6	5.15385
95	98.9474	4	3	3	2	6	10	2	11	6	6	6	4	6	5.30769
96	98.9583	2	3	5	10	12	5	3	7	5	7	5	2	5	5.46154
97	98.9691	2	6	7	2	7	2	3	9	3	5	8	6	2	4.76923
98	98.9796	4	4	5	2	6	2	8	6	5	2	6	2	11	4.84615
99	98.9899	3	7	6	3	8	2	6	5	9	3	2	5	3	4.76923
100	99	566	534	545	776	781	744	580	571	549	508	563	780	558	619.615
101	99.0099	807	827	601	852	575	538	554	565	591	568	782	565	849	667.231
102	99.0196	783	619	771	856	635	785	625	847	542	580	831	839	573	714.308
103	99.0291	865	662	895	799	854	594	591	873	653	595	826	653	655	731.923
104	99.0385	923	617	729	681	828	902	898	920	940	914	895	931	648	832.769
105	99.0476	671	661	691	930	649	826	723	933	678	693	884	749	688	752
106	99.0566	740	764	939	719	753	750	709	742	977	929	769	1016	930	825.923
107	99.0654	918	773	963	778	771	1002	716	954	835	743	733	750	710	818.923
108	99.0741	775	815	796	1033	845	790	807	835	1009	768	794	1018	793	852.154
109	99.0826	1001	1032	834	864	829	999	1011	814	734	1013	798	1061	1037	925.154
110	99.0909	0	889	833	0	1055	875	850	842	850	1087	844	857	891	759.462
111	99.0991	851	865	1141	876	927	940	818	880	877	1083	844	886	935	917.154
112	99.1071	901	916	902	913	922	925	951	1070	1083	912	1130	920	937	960.154
113	99.115	1142	932	1124	888	1004	1087	1064	949	1188	1148	0	925	884	948.846
114	99.1228	941	1179	984	986	1147	940	1009	1159	966	1149	910	969	1173	1039.38
115	99.1304	1238	957	989	1025	1186	982	957	1220	1028	1225	1015	1106	995	1071
116	99.1379	1047	1004	1210	1240	1043	1015	1194	1201	1222	1009	972	1234	1047	1110.62
117	99.1453	1008	1246	1061	1075	1253	1163	1276	1206	1023	932	1062	1077	1299	1129.31
118	99.1525	1086	1229	1193	1132	1158	1092	1105	1274	1075	1085	1064	1281	1250	1155.69
119	99.1597	1048	1088	1272	1231	1297	1063	1071	1282	1131	1109	1099	1262	1129	1160.15
120	99.1667	1102	1137	1220	1110	1182	1156	1081	1125	1154	1280	1292	1108	1379	1178.92
121	99.1736	1277	1117	1165	1254	1269	1088	1268	1121	1313	1288	1160	1333	1241	1222.62
122	99.1803	1194	1209	1144	1124	1314	1169	1152	1321	1257	1271	1092	1135	1194	1198.15
123	99.187	1165	1167	1130	1289	1169	1174	1192	1142	1205	1237	1296	1140	1310	1201.23
124	99.1935	1130	1150	1241	1140	1181	1242	1270	1224	1150	1174	1181	1233	1286	1200.15
125	99.2	1116	1351	1152	1304	1271	1135	1154	1115	1242	1087	1106	1070	1165	1174.46
126	99.2063	1154	1114	1343	1105	1154	1119	1100	1325	1262	1098	1249	1074	1304	1184.69
127	99.2126	961	970	1204	1135	1028	1011	1006	1241	997	997	1153	976	979	1050.62
128	99.2188	1	1	1	1	1	1	1	1	1	1	1	1	1	1
129	99.2248	1	1	1	1	1	1	1	1	1	1	1	1	1	1
130	99.2308	1	1	1	1	1	1	1	1	1	1	1	1	1	1
131	99.2366	1	1	1	1	1	1	1	1	1	1	1	1	1	1
132	99.2424	1	1	1	1	1	1	1	1	1	1	1	1	1	1
133	99.2481	1	1	1	1	1	1	1	1	1	1	1	1	1	1
134	99.2537	1	1	1	1	1	1	1	1	1	1	1	1	1	1
135	99.2593	1	1	1	1	1	1	1	1	1	1	1	1	1	1
136	99.2647	1	1	1	1	1	1	1	1	1	1	1	1	1	1
137	99.2701	1	1	1	1	1	1	1	1	1	1	1	1	1	1
138	99.2754	1	1	1	1	1	1	1	1	1	1	1	1	1	1
139	99.2806	1	1	1	1	1	1	1	1	1	1	1	1	1	1
140	99.2857	1	1	1	1	1	1	1	1	1	1	1	1	1	1
141	99.2908	1	1	1	1	1	1	1	1	1	1	1	1	1	1
142	99.2958	1	1	1	1	1	1	1	1	1	1	1	1	1	1
143	99.3007	1	1	1	1	1	1	1	1	1	1	1	1	1	1
144	99.3056	1	1	1	1	1	1	1	1	1	1	1	1	1	1
145	99.3103	1	1	1	1	1	1	1	1	1	1	1	1	1	1
146	99.3151	1	1	1	1	1	1	1	1	1	1	1	1	1	1
147	99.3197	1	1	1	1	1	1	1	1	1	1	1	1	1	1
148	99.3243	1	1	1	1	1	1	1	1	1	1	1	1	1	1
149	99.3289	1	1	1	1	1	1	1	1	1	1	1	1	1	1
150	99.3333	1	1	1	1	1	1	1	1	1	1	1	1	1	1
151	99.3377	1	1	1	1	1	1	1	1	1	1	1	1	1	1
152	99.3421	1	1	1	1	1	1	1	1	1	1	1	1	1	1
153	99.3464	1	1	1	1	1	1	1	1	1	1	1	1	1	1
154	99.3506	1	1	1	1	1	1	1	1	1	1	1	1	1	1
155	99.3548	1	1	1	1	1	1	1	1	1	1	1	1	1	1
156	99.359	1	1	1	1	1	1	1	1	1	1	1	1	1	1
157	99.3631	1	1	1	1	1	1	1	1	1	1	1	1	1	1
158	99.3671	1	1	1	1	1	1	1	1	1	1	1	1	1	1
159	99.3711	1	1	1	1	1	1	1	1	1	1	1	1	1	1
160	99.375	1	1	1	1	1	1	1	1	1	1	1	1	1	1
161	99.3789	1	1	1	1	1	1	1	1	1	1	1	1	1	1
162	99.3827	1	1	1	1	1	1	1	1	1	1	1	1	1	1
163	99.3865	1	1	1	1	1	1	1	1	1	1	1	1	1	1
164	99.3902	1	1	1	1	1	1	1	1	1	1	1	1	1	1
165	99.3939	0	1	1	1	1	1	1	1	1	1	1	1	1	0.923077
166	99.3976	1	1	1	1	1	1	1	1	1	1	1	1	1	1
167	99.4012	1	1	1	1	1	1	1	1	1	1	1	1	1	1
168	99.4048	1	1	1	1	1	1	1	1	1	1	1	1	1	1
169	99.4083	1	1	1	1	1	1	1	1	1	1	1	1	1	1
170	99.4118	1	1	1	1	1	1	1	1	1	1	1	1	1	1
171	99.4152	1	1	1	1	1	1	1	1	1	1	1	1	1	1
172	99.4186	1	1	1	1	1	1	1	1	1	1	1	1	1	1
173	99.422	1	1	1	1	1	1	1	1	1	1	1	1	1	1
174	99.4253	1	1	1	1	1	1	1	1	1	1	1	1	1	1
175	99.4286	1	1	1	1	1	1	1	1	1	1	1	1	1	1
176	99.4318	1	1	1	1	1	1	1	1	1	1	1	1	1	1
177	99.435	1	1	1	1	1	1	1	1	1	1	1	1	1	1
178	99.4382	0	1	1	1	1	1	1	1	1	1	1	1	1	0.923077
179	99.4413	1	1	1	1	1	1	1	1	1	1	1	1	1	1
180	99.4444	1	1	1	1	1	1	1	1	1	1	1	1	1	1
181	99.4475	1	1	1	1	1	1	1	1	1	1	1	1	1	1
182	99.4505	1	1	1	1	1	1	1	1	1	1	1	1	1	1
183	99.4536	1	1	1	1	1	1	1	1	1	1	1	1	1	1
184	99.4565	1	1	1	1	1	1	1	1	1	1	1	1	1	1
185	99.4595	1	1	1	1	1	1	1	1	1	1	1	1	1	1
186	99.4624	1	1	1	1	1	1	1	1	1	1	1	1	1	1
187	99.4652	1	1	1	1	1	1	1	1	1	1	1	1	1	1
188	99.4681	1	1	1	1	1	1	1	1	1	1	1	1	1	1
189	99.4709	1	1	1	1	1	1	1	1	1	1	1	1	1	1
190	99.4737	1	1	1	1	1	1	1	1	1	1	1	1	1	1
191	99.4764	1	1	1	1	1	1	1	1	1	1	1	1	1	1
192	99.4792	1	1	1	1	1	1	1	1	1	1	1	1	1	1
193	99.4819	1	1	1	1	1	1	1	1	1	1	1	1	1	1
194	99.4845	1	1	1	1	1	1	1	1	1	1	1	1	1	1
195	99.4872	1	1	1	1	1	1	1	1	1	1	1	1	1	1
196	99.4898	1	1	1	1	1	1	1	1	1	1	1	1	1	1
197	99.4924	1	1	1	1	1	1	1	1	1	1	0	1	1	0.923077
198	99.4949	1	1	1	1	1	1	1	1	1	1	1	1	1	1
199	99.4975	1	1	1	1	1	1	1	1	1	1	1	1	1	1
200	99.5	1	1	1	1	1	1	1	1	1	1	1	1	1	1
201	99.5025	1	1	1	1	1	1	1	1	1	1	1	1	1	1
202	99.505	1	1	1	1	1	1	1	1	1	1	1	1	1	1
203	99.5074	1	1	1	1	1	1	1	1	1	1	1	1	1	1
204	99.5098	1	1	1	1	1	1	1	1	1	1	1	1	1	1
205	99.5122	1	1	1	1	1	1	1	1	1	1	1	1	1	1
206	99.5146	1	1	1	1	1	1	1	1	1	1	1	1	1	1
207	99.5169	1	1	1	1	1	1	1	1	1	1	1	1	1	1
208	99.5192	1	1	1	1	1	1	1	1	1	1	1	1	1	1
209	99.5215	1	1	1	1	1	1	1	1	1	1	1	1	1	1
210	99.5238	1	1	1	1	1	1	1	1	1	1	1	1	1	1
211	99.5261	1	1	1	1	1	1	1	1	1	1	1	1	1	1
212	99.5283	1	1	1	1	1	1	1	1	1	1	1	1	1	1
213	99.5305	1	1	1	1	1	1	1	1	1	1	1	1	1	1
214	99.5327	1	1	1	1	1	1	1	1	1	1	1	1	1	1
215	99.5349	1	1	1	1	1	1	1	1	1	1	1	1	1	1
216	99.537	1	1	1	1	1	1	1	1	1	1	1	1	1	1
217	99.5392	1	1	1	1	1	1	1	1	1	1	1	1	1	1
218	99.5413	1	1	1	1	1	1	1	1	1	1	1	1	1	1
219	99.5434	1	1	1	1	1	1	1	1	1	1	1	1	1	1
220	99.5455	1	1	1	1	1	1	1	1	1	1	1	1	1	1
221	99.5475	1	1	1	1	1	1	1	1	1	1	1	1	1	1
222	99.5495	1	1	1	1	1	1	1	1	1	1	1	1	1	1
223	99.5516	1	1	1	1	1	1	1	1	1	1	1	1	1	1
224	99.5536	1	1	1	1	1	1	1	1	1	1	1	1	1	1
225	99.5556	1	1	1	1	1	1	1	1	1	1	1	1	1	1
226	99.5575	1	1	1	1	1	1	1	1	1	1	1	1	1	1
227	99.5595	1	1	1	1	1	1	1	1	1	1	1	1	1	1
228	99.5614	1	1	1	1	1	1	1	1	1	1	1	1	1	1
229	99.5633	1	1	1	1	1	1	1	1	1	1	1	1	1	1
230	99.5652	1	1	1	1	1	1	1	1	1	1	1	1	1	1
231	99.5671	1	1	1	1	1	1	1	1	1	1	1	1	1	1
232	99.569	1	1	1	1	1	1	1	1	1	1	1	1	1	1
233	99.5708	1	1	1	1	1	1	1	1	1	1	1	1	1	1
234	99.5726	1	1	1	1	1	1	1	1	1	1	1	1	1	1
235	99.5745	1	1	1	1	1	1	1	1	1	1	1	1	1	1
236	99.5763	1	1	1	1	1	1	1	1	1	1	1	1	1	1
237	99.5781	1	1	1	1	1	1	1	1	1	1	1	1	1	1
238	99.5798	1	1	1	1	1	1	1	1	1	1	1	1	1	1
239	99.5816	1	1	1	1	1	1	1	1	1	1	1	1	1	1
240	99.5833	1	1	1	1	1	1	1	1	1	1	1	1	1	1
241	99.5851	1	1	1	1	1	1	1	1	1	1	1	1	1	1
242	99.5868	1	1	1	1	1	1	1	1	1	1	1	1	1	1
243	99.5885	1	1	1	1	1	1	1	1	1	1	1	1	1	1
244	99.5902	1	1	1	1	1	1	1	1	1	1	1	1	1	1
245	99.5918	1	1	1	1	1	1	1	1	1	1	1	1	1	1
246	99.5935	1	1	1	1	1	1	1	1	1	1	1	1	1	1
247	99.5951	1	1	1	1	1	1	1	1	1	1	1	1	1	1
248	99.5968	1	1	1	1	1	1	1	1	1	1	1	1	1	1
249	99.5984	1	1	1	1	1	1	1	1	1	1	1	1	1	1
250	99.6	1	1	1	1	1	1	1	1	1	1	1	1	1	1
